# Supplementary material for: Relationship between Cerebrospinal Fluid Matrix Metalloproteinases Levels and Brain Amyloid Deposition in Mild Cognitive Impairment
Source: MDPI journal article supplement (doi:10.3390/biom11101496), 2021-10-11
Supplement: s1 [file s1]

Supplementally table S1. Comparison of CSF MMP and TIMP levels between APOE4-negative and APOE4-positive groups

|        | APOE4-negative<br>(n=22) | APOE4-positive<br>(n=11) | <i>p</i> |
|--------|--------------------------|--------------------------|----------|
| MMP-2  | 7795.1 ± 2404.5          | 7997.1 ± 3525.7          | 0.955    |
| MMP-7  | 54.2 ± 25.3              | 65.9 ± 34.4              | 0.440    |
| MMP-12 | 34.7 ± 41.3              | 59.7 ± 107.2             | 0.380    |
| TIMP-1 | 26872.9 ± 8218.7         | 29235.7 ± 8665           | 0.355    |
| TIMP-2 | 23585.7 ± 6007.7         | 25415 ± 6498.2           | 0.778    |

MMP, matrix metalloproteinase; TIMP, tissue inhibitor of metalloproteinase. <sup>1</sup> A *p*-value < 0.05 was considered statistically significant.

Supplementally table S2. Comparison of CSF MMP and TIMP levels between individuals with and without vascular risk factors.

|        | Vascular risk factor (+)<br>(n=27) | Vascular risk factor (-)<br>(n=6) | <i>p</i> |
|--------|------------------------------------|-----------------------------------|----------|
| MMP-2  | 8026.5 ± 2983.7                    | 7124 ± 1452.8                     | 0.733    |
| MMP-7  | 56.3 ± 28.3                        | 66.2 ± 31.6                       | 0.508    |
| MMP-12 | 47.4 ± 75.7                        | 23.4 ± 26.8                       | 0.545    |
| TIMP-1 | 27971.1 ± 8881.2                   | 26262.7 ± 5388.1                  | 0.600    |
| TIMP-2 | 24209.8 ± 6582.2                   | 24131.3 ± 3956.7                  | 0.982    |

MMP, matrix metalloproteinase; TIMP, tissue inhibitor of metalloproteinase. <sup>1</sup> A *p*-value < 0.05 was considered statistically significant.
